# Supplementary material
Source: PubMed Central journal article supplement (PMC3170432)
Supplement: NIHMS295160-supplement-01.pdf [file NIHMS295160-supplement-01.pdf]

**Supplementary Table 1a. Baseline characteristics and treatment failure outcomes for individual subjects**

| Subject                            | New or Refractory DM | Treatment failure? (Yes/No) | Time to Treatment failure (days) | Gender | Age | Prednisone dosage at screening (duration)                          | Prednisone dosage at randomization | Other therapy at randomization (duration) |
|------------------------------------|----------------------|-----------------------------|----------------------------------|--------|-----|--------------------------------------------------------------------|------------------------------------|-------------------------------------------|
| <b>Etanercept-treated subjects</b> |                      |                             |                                  |        |     |                                                                    |                                    |                                           |
| 10-4018                            | Refractory           | Yes                         | 189                              | F      | 60  | 40mg/d (2 months)                                                  | 40mg/d                             | -                                         |
| 12-0006                            | New                  | Yes                         | 358                              | M      | 21  | 0                                                                  | 60mg/d                             | -                                         |
| 12-0007                            | New                  | No                          | -                                | M      | 37  | 0                                                                  | 60mg/d                             | -                                         |
| 12-0008                            | Refractory           | No                          | -                                | M      | 51  | 0 mg (was on prednisone in past but d/c secondary to side effects) | 0mg                                | -                                         |
| 13-0016                            | Refractory           | No                          | -                                | F      | 30  | 40mg/d (≈1 month)                                                  | 40mg/d                             | -                                         |
| 13-0017                            | Refractory           | No                          | -                                | F      | 25  | 5mg/d (≈2.5 months)                                                | 5mg/d                              | Methotrexate 20 mg/week (≈4.5 months)     |
| 21-0001                            | Refractory           | Yes                         | 197                              | F      | 43  | 60mg/d (≈3 months)                                                 | 60mg/d                             | -                                         |
| 21-0002                            | Refractory           | Yes                         | 85                               | M      | 61  | 60mg/d (≈2 months)                                                 | 60mg/d                             | -                                         |
| 21-0003                            | Refractory           | Yes                         | 224                              | F      | 58  | 60mg/d (≈11.5 months)                                              | 60mg/d                             | Methotrexate 15 mg/week (≈11.5 months)    |
| 29-0061                            | New                  | No                          | -                                | M      | 34  | 40mg/d (< 2 months)                                                | 60mg/d                             | -                                         |
| 32-0001                            | Refractory           | Yes                         | 193                              | F      | 57  | 40mg/d (≈22 months)                                                | 60mg/d                             | Methotrexate 25 mg/week (≈21.5 months)    |
| <b>Placebo-Treated Subjects</b>    |                      |                             |                                  |        |     |                                                                    |                                    |                                           |
| 02-2101                            | Refractory           | Yes                         | 60                               | F      | 44  | 20mg/d (≈0.75)                                                     | 20mg/d                             | -                                         |

|         |            |     |     |   |    |                        |         |                                           |
|---------|------------|-----|-----|---|----|------------------------|---------|-------------------------------------------|
|         |            |     |     |   |    | month)                 |         |                                           |
| 02-2102 | Refractory | Yes | 172 | F | 52 | 25mg                   | 25mg/d  | -                                         |
| 10-4017 | Refractory | Yes | 79  | M | 50 | 40mg/d<br>(≈1.5months) | 40mg/d  | Methotrexate<br>10mg/week<br>(≈3.5months) |
| 13-0015 | New        | Yes | 168 | F | 25 | 60mg/d<br>(≈1.5months) | 60mg/d  | -                                         |
| 28-0001 | New        | Yes | 148 | F | 50 | 50mg<br>(<2 months)    | 60 mg/d | -                                         |

**Supplementary Table 1b. Baseline characteristics for individual subjects**

| Subject                            | Physician global activity assessment | Patient global activity assessment | Average MMT score | Average standardized MVICT score | Average % predicted normal MVICT score | MYOACT-Total | MYOACT – Muscle Disease Activity | MYOACT – Cutaneous Disease Activity | CDASI |
|------------------------------------|--------------------------------------|------------------------------------|-------------------|----------------------------------|----------------------------------------|--------------|----------------------------------|-------------------------------------|-------|
| <b>Etanercept-Treated Subjects</b> |                                      |                                    |                   |                                  |                                        |              |                                  |                                     |       |
| 10-4018                            | 4.05                                 | 4.85                               | 4.16              | -4.65                            | 42.68                                  | 0.07500      | 3.70                             | 4.50                                | 14.5  |
| 12-0006                            | 1.30                                 | 1.55                               | 4.94              | -0.53                            | 90.05                                  | 0.07583      | 1.50                             | 2.20                                | 11.5  |
| 12-0007                            | 2.55                                 | 5.00                               | 5.00              | -1.20                            | 80.37                                  | 0.10417      | 0.65                             | 3.15                                | 16.0  |
| 12-0008                            | 2.40                                 | 5.45                               | 4.91              | -2.98                            | 58.15                                  | 0.14000      | 1.95                             | 2.40                                | 7.0   |
| 13-0016                            | 6.45                                 | 7.45                               | 3.44              | -5.08                            | 38.83                                  | 0.24083      | 5.70                             | 5.35                                | 11.0  |
| 13-0017                            | 6.20                                 | 7.35                               | 4.65              | -4.27                            | 45.05                                  | 0.23333      | 5.90                             | 5.55                                | 9.5   |
| 21-0001                            | 4.35                                 | 1.05                               | 4.30              | -4.81                            | 40.28                                  | 0.12000      | 5.10                             | 7.00                                | 22.5  |
| 21-0002                            | 4.85                                 | 8.15                               | 3.81              | -6.05                            | 33.84                                  | 0.07750      | 4.35                             | 1.70                                | 8.0   |
| 21-0003                            | 1.75                                 | 5.45                               | 4.51              | -4.53                            | 43.36                                  | 0.01667      | 1.90                             | 0.00                                | 0.0   |
| 29-0061                            | 5.00                                 | 7.15                               | 4.54              | -7.58                            | 34.52                                  | 0.15250      | 2.35                             | 5.00                                | 12.0  |
| 32-0001                            | 5.40                                 | 5.70                               | 4.79              | -                                | -                                      | 0.21833      | 2.05                             | -0.3                                | 19.0  |
| <b>Placebo-Treated Subjects</b>    |                                      |                                    |                   |                                  |                                        |              |                                  |                                     |       |
| 02-2101                            | 3.15                                 | 4.90                               | 4.81              | -2.58                            | 62.14                                  | 0.09500      | 2.10                             | 1.25                                | 1.0   |
| 02-2102                            | 1.00                                 | 4.45                               | 4.06              | -4.20                            | 46.39                                  | 0.08416      | 1.25                             | 1.35                                | 3.5   |
| 10-4017                            | 4.55                                 | 4.10                               | 4.60              | -4.97                            | 40.10                                  | 0.09667      | 4.30                             | 2.10                                | 14.0  |
| 13-0015                            | 7.35                                 | 8.55                               | 3.55              | -6.98                            | 28.05                                  | 0.12250      | 3.30                             | 1.35                                | 4.5   |
| 28-0001                            | 4.90                                 | 8.50                               | 4.22              | -3.85                            | 48.73                                  | 0.14833      | 3.40                             | 5.75                                | 19.0  |

**Supplementary Table 1c. Baseline characteristics and autoantibody data for individual subjects**

| Subject                            | HAQ  | INQoL – Overall Quality of Life score | INQoL - Weakness score | SF-36 - Physical Component Summary | SF-36 - Mental Component Summary | Creatine Kinase (U/L) | Bone Density - lumbar spine Z-score | Autoantibodies? (Yes/No)                       |
|------------------------------------|------|---------------------------------------|------------------------|------------------------------------|----------------------------------|-----------------------|-------------------------------------|------------------------------------------------|
| <b>Etanercept-Treated Subjects</b> |      |                                       |                        |                                    |                                  |                       |                                     |                                                |
| 10-4018                            | 1.00 | 66.39                                 | 73.684                 | 41.6619                            | 49.1206                          | 19                    | -0.6                                | Yes (ANA)                                      |
| 12-0006                            | 0.25 | 23.06                                 | 34.211                 | 41.7564                            | 41.4870                          | 90                    | 1.0                                 | No                                             |
| 12-0007                            | 0.00 | 66.39                                 | 52.632                 | 32.3958                            | 47.7199                          | 107                   | -                                   | No                                             |
| 12-0008                            | 1.06 | 55.83                                 | 73.684                 | 33.1294                            | 42.0635                          | 213                   | -                                   | No                                             |
| 13-0016                            | 2.81 | 97.5                                  | 100.000                | 23.8398                            | 18.6668                          | 252                   | -3                                  | No at baseline, but ANA positive at last visit |
| 13-0017                            | 1.13 | 57.22                                 | 68.421                 | 21.8339                            | 51.9058                          | 1103                  | 0.7                                 | Yes (ANA, U1RNP)                               |
| 21-0001                            | .88  | 37.50                                 | 26.316                 | 39.4250                            | 42.3775                          | 27                    | -1                                  | No                                             |
| 21-0002                            | 2.00 | 83.61                                 | 100.000                | 24.5583                            | 31.3556                          | 6991                  | 0.3                                 | No                                             |
| 21-0003                            | 2.69 | 77.22                                 | 81.579                 | 22.4435                            | 51.2279                          | 35                    | -0.1                                | No at baseline, but ANA positive at last visit |
| 29-0061                            | 0.19 | 51.94                                 | 47.368                 | 44.4971                            | 35.1301                          | 140                   | 0.6                                 | Yes (SSA, Jo-1)                                |
| 32-0001                            | 0.81 | 21.94                                 | 52.632                 | 26.5811                            | 53.3552                          | 57                    | -3                                  | No                                             |
| <b>Placebo-Treated Subjects</b>    |      |                                       |                        |                                    |                                  |                       |                                     |                                                |
| 02-2101                            | 0.25 | 54.44                                 | 34.211                 | 28.7478                            | 53.8412                          | 87                    | 0.1                                 | No                                             |

|         |      |       |         |         |         |      |      |                                            |
|---------|------|-------|---------|---------|---------|------|------|--------------------------------------------|
| 02-2102 | 1.56 | 60.56 | 76.316  | 29.4734 | 26.8325 | 2162 | -0.5 | Yes<br>(PM-Scl, Jo-1)                      |
| 10-4017 | 0.06 | 48.89 | 18.421  | 47.6464 | 58.8911 | 1639 | -2   | No                                         |
| 13-0015 | 2.50 | 63.61 | 100.000 | 13.7193 | 60.0225 | 1446 | -.1  | No                                         |
| 28-0001 | 1.38 | 84.17 | 97.368  | 28.6531 | 35.5148 | 158  | 1.7  | No at baseline, but<br>ANA positive at end |

Subject 28-0001 developed ovarian cancer

**Abbreviations:**

MMT = Manual Muscle Testing; MVICT = Maximum Voluntary Isometric Contraction Testing; MYOACT = Myositis Disease

Activity Assessment Visual Analogue Scales; HAQ = Health Assessment Questionnaire; CDASI = Cutaneous Disease Activity Score

Index; INQoL = Individualized Neuromuscular Quality of Life; ≈, approximately

**Supplementary Table 2. Adverse Events**

|                                    | <b>Etanercept (n = 11)</b> | <b>Placebo (n = 5)</b> |
|------------------------------------|----------------------------|------------------------|
| <b>Cancer</b>                      | <b>0</b>                   | <b>1 (Ovarian)</b>     |
| <b>Pregnancy and miscarriage</b>   | <b>1</b>                   | <b>0</b>               |
| <b>Upper respiratory infection</b> | <b>5</b>                   | <b>1</b>               |
| <b>Urinary tract infection</b>     | <b>2</b>                   | <b>1</b>               |
| <b>Gastroenteritis / diarrhea</b>  | <b>3</b>                   | <b>3</b>               |
| <b>Zoster</b>                      | <b>1</b>                   | <b>0</b>               |
| <b>Other infection</b>             | <b>6</b>                   | <b>3</b>               |
| <b>Fever</b>                       | <b>1</b>                   | <b>1</b>               |
| <b>Worsening rash / pruritis</b>   | <b>5</b>                   | <b>1</b>               |
| <b>Interstitial lung disease</b>   | <b>1</b>                   | <b>0</b>               |
| <b>Musculoskeletal pain</b>        | <b>6</b>                   | <b>3</b>               |
| <b>Fatigue</b>                     | <b>1</b>                   | <b>1</b>               |
| <b>Nausea</b>                      | <b>3</b>                   | <b>2</b>               |
| <b>Abdominal pain</b>              | <b>0</b>                   | <b>2</b>               |
| <b>Constipation</b>                | <b>1</b>                   | <b>0</b>               |
| <b>Heartburn</b>                   | <b>3</b>                   | <b>0</b>               |
| <b>Bronchospasm</b>                | <b>0</b>                   | <b>1</b>               |
| <b>Dyspnea</b>                     | <b>1</b>                   | <b>2</b>               |
| <b>Vaginal bleeding</b>            | <b>0</b>                   | <b>1</b>               |

|                                |          |          |
|--------------------------------|----------|----------|
| <b>Acute psychosis</b>         | <b>1</b> | <b>0</b> |
| <b>Depression</b>              | <b>2</b> | <b>0</b> |
| <b>Anxiety</b>                 | <b>1</b> | <b>0</b> |
| <b>Tinnitus</b>                | <b>1</b> | <b>0</b> |
| <b>Dizziness</b>               | <b>2</b> | <b>1</b> |
| <b>Headache</b>                | <b>3</b> | <b>4</b> |
| <b>Toothache</b>               | <b>3</b> | <b>0</b> |
| <b>Hypertension</b>            | <b>3</b> | <b>1</b> |
| <b>Cataracts</b>               | <b>1</b> | <b>0</b> |
| <b>Blurred vision</b>          | <b>1</b> | <b>1</b> |
| <b>Increased blood glucose</b> | <b>0</b> | <b>1</b> |

This Table shows the number of subjects in each treatment group experiencing one of the above adverse events (AE). There were no significant treatment group differences in frequencies of any AE.

**Supplementary Table 3. Test-Retest Reliability of Outcome Measures**

| Outcome Variable                                | ICC  | 95% Lower Confidence Bound |
|-------------------------------------------------|------|----------------------------|
| Average MMT score                               | 0.98 | 0.95                       |
| Average standardized MVICT score                | 0.90 | 0.78                       |
| Average percent of predicted normal MVICT score | 0.91 | 0.79                       |
| Time to arise from a chair                      | 0.95 | 0.88                       |
| Time to walk 30 feet                            | 0.99 | 0.98                       |
| Physician global activity assessment            | 0.94 | 0.87                       |
| Patient global activity assessment              | 0.79 | 0.56                       |
| MYOACT score                                    | 0.90 | 0.77                       |
| CDASI score                                     | 0.96 | 0.90                       |
| Pruritis severity                               | 0.91 | 0.79                       |
| HAQ score                                       | 0.96 | 0.92                       |
| SF-36 scores                                    |      |                            |
| -Physical Component Summary                     | 0.90 | 0.79                       |
| -Mental Component Summary                       | 0.93 | 0.85                       |
| INQoL Overall Quality of Life score             | 0.89 | 0.76                       |

## Abbreviations:

ICC = Intraclass Correlation Coefficient; MMT = Manual Muscle Testing; MVICT = Maximum Voluntary Isometric Contraction Testing; MYOACT = Myositis Disease Activity Assessment Visual Analogue Scales; HAQ = Health Assessment Questionnaire; CDASI = Cutaneous Disease Activity Score Index; INQoL = Individualized Neuromuscular Quality of Life

In order to assess test-retest reliability the outcome measures were performed on two consecutive days at the baseline visit by the same evaluator. Reliability was very good for the outcome measures studied.



**Supplementary Table 4. Subjects Meeting IMACS Definitions of Improvement**

| Definition of Improvement (DOI)                                                                                                                                                                                                                          | Etanercept (Subjects meeting DOI) |             | Placebo (Subjects meeting DOI) |            |
|----------------------------------------------------------------------------------------------------------------------------------------------------------------------------------------------------------------------------------------------------------|-----------------------------------|-------------|--------------------------------|------------|
|                                                                                                                                                                                                                                                          | Week 24                           | Week 52     | Week 24                        | Week 52    |
| <b>A1.</b> 3 of any 6 core set measures improved by 20% or more, with no more than 2 worse by 25% or more, which cannot be MMT or MVICT                                                                                                                  | 9<br>(82%)                        | 6*<br>(55%) | 2<br>(40%)                     | 3<br>(60%) |
| <b>A2.</b> Physician Global Activity improved by greater than 30% and MMT or MVICT improved by 1 – 15%, OR MMT or MVICT improved by greater than 15% and Physician Global Activity improved by greater than 10%, AND no more than 2 worse by 25% or more | 9<br>(82%)                        | 6*<br>(55%) | 2<br>(40%)                     | 2<br>(40%) |
| <b>A3a.</b> MMT improved by at least 15%, OR Physician Global Activity improved by greater than 30% and MMT or MVICT improved by 1 – 15%, AND no more than 2 worse by 25% or more                                                                        | 9<br>(82%)                        | 7*<br>(64%) | 2<br>(40%)                     | 3<br>(60%) |
| <b>A3b.</b> 3 of any 6 measures improved by 20% or more, with no more than 2 worse by 25% or more                                                                                                                                                        | 9<br>(82%)                        | 7*<br>(64%) | 2<br>(40%)                     | 3<br>(60%) |
| <b>A5a.</b> Physician Global Activity improved by greater than 30% and MMT or MVICT improved by 1 – 15%, OR MMT or MVICT improved by greater than 15% and Physician Global Activity improved by greater than 10%                                         | 9<br>(82%)                        | 6*<br>(55%) | 2<br>(40%)                     | 2<br>(40%) |
| <b>A5b.</b> 3 of any 6 measures improved by 15% or more, with no more than 1 worse by 25% or more, which cannot be MMT or MVICT                                                                                                                          | 9<br>(82%)                        | 6*<br>(55%) | 2<br>(40%)                     | 2<br>(40%) |

The 6 IMACS Core Set Measures referred to in the Table are Physical Global Activity Assessment, Patient Global Activity Assessment, Manual Muscle Testing, Extramuscular Assessment on MYOACT, Health Assessment Questionnaire, and muscle enzymes (eg., CK).

We modified from IMACS DOI criteria proposed by Rider LG, et al. (reference 29) by including the Average Percent of Predicted Normal MVICT score in addition to the MMT score for muscle strength testing.

**Abbreviations:**

MMT = Manual Muscle Testing; MVICT = Maximum Voluntary Isometric Contraction

Testing
